# Supplementary material for: Magnetic structure of (C5H12N)CuBr3: origin of the uniform Heisenberg chain behavior and the magnetic anisotropy of the Cu2+(S = 1/2) ions
Source: Royal Society of Chemistry journal article supplement (doi:10.1039/c5ra26341g), 2016-01-01
Supplement: c5ra26341g1.pdf [file c5ra26341g1.pdf]

Supporting Information

for

**Magnetic structure of (C<sub>5</sub>H<sub>12</sub>N)CuBr<sub>3</sub>: Origin of the uniform Heisenberg chain behavior  
and the magnetic anisotropy of the Cu<sup>2+</sup> (S = 1/2) ions**

Changhoon Lee<sup>1,2,3</sup>, Jisook Hong<sup>2</sup>, Won-joon Son<sup>4</sup>, Erjun Kan<sup>5</sup>, Ji Hoon Shim<sup>2,3,\*</sup>, and Myung-  
Hwan Whangbo<sup>1,\*</sup>

<sup>1</sup>*Department of Chemistry, North Carolina State University, Raleigh, North Carolina 27695-8204, USA*

<sup>2</sup>*Department of Chemistry, Pohang University of Science and Technology, Pohang 790-784, Korea*

<sup>3</sup>*Division of Advanced Nuclear Engineering, Pohang University of Science and Technology, Pohang 790-784, Korea*

<sup>4</sup>*Samsung Advanced Institute of Technology, Suwon, Gyeonggi-do, South Korea, 443-803, Korea*

<sup>5</sup>*Department of Applied Physics and Key Laboratory of Soft Chemistry and Functional Materials (Ministry of Education), Nanjing University of Science and Technology, Nanjing, Jiangsu 210094, P. R. China.*

Table S1. Values of the coefficients  $n_1 - n_7$  of Eq. 2 for the seven ordered spin states FM and AF1 – AF6

|     | $n_1$ | $n_2$ | $n_3$ | $n_4$ | $n_5$ | $n_6$ |
|-----|-------|-------|-------|-------|-------|-------|
| FM  | -4    | -4    | -8    | -4    | -8    | -8    |
| AF1 | +4    | +4    | -8    | +4    | -8    | -8    |
| AF2 | -4    | -4    | -8    | +4    | +8    | 0     |
| AF3 | +4    | -4    | +8    | +4    | -8    | -8    |
| AF4 | +4    | -4    | +8    | -4    | +8    | 0     |
| AF5 | 0     | +4    | 0     | 0     | +8    | 0     |
| AF6 | -4    | -4    | -8    | -4    | -8    | +8    |

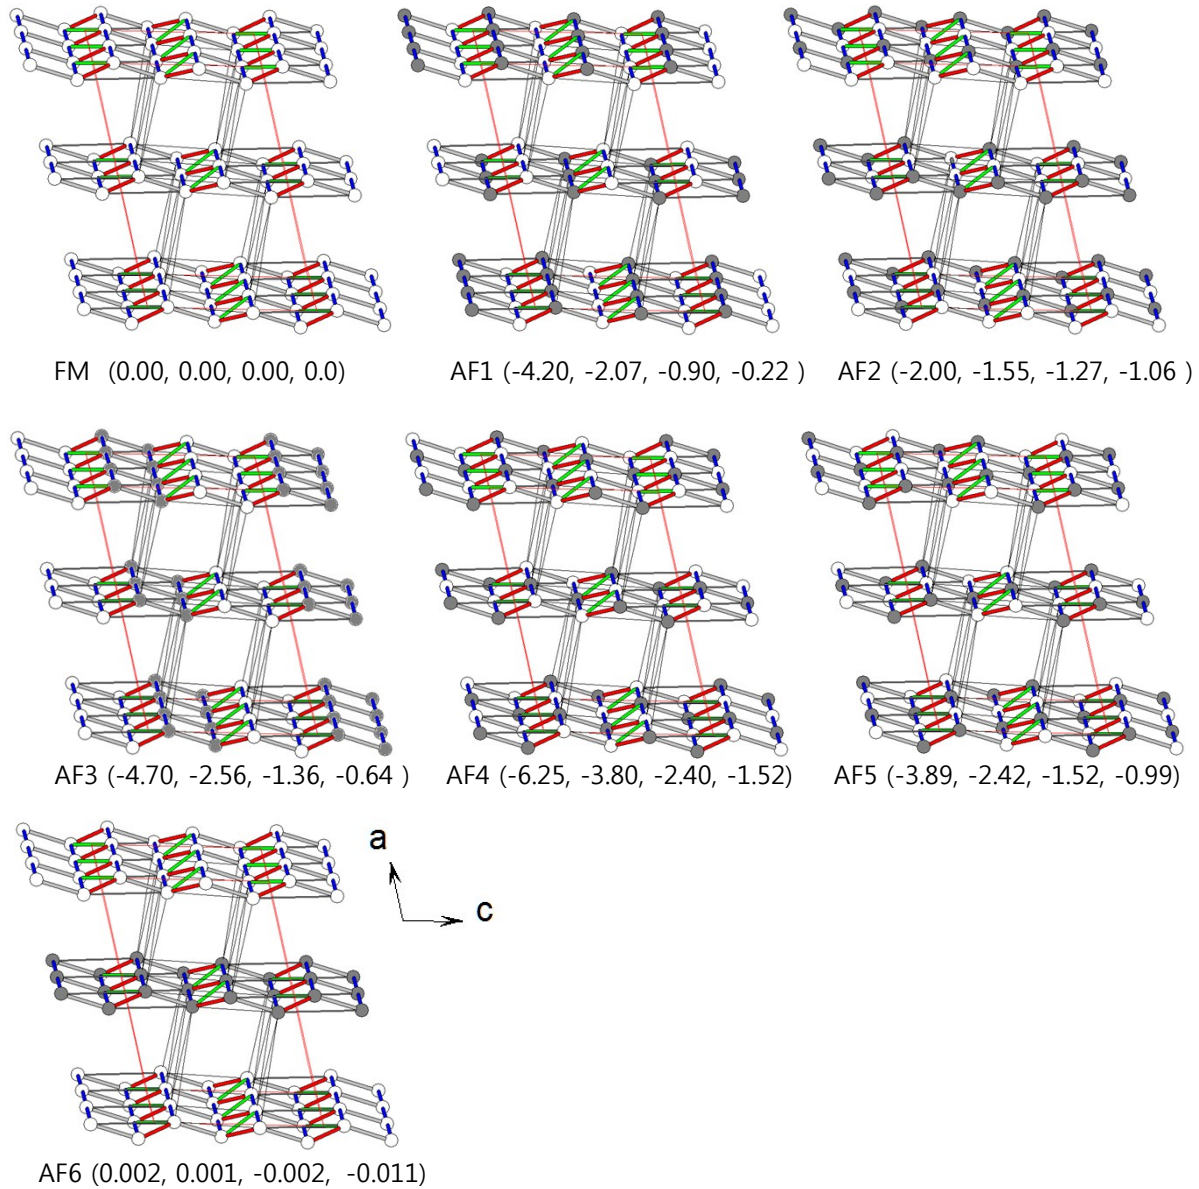

Figure S1. Ordered spin arrangements of  $(\text{C}_5\text{H}_{12}\text{N})\text{CuBr}_3$  employed for the extraction of the six spin exchange parameters  $J_1 - J_6$ . The up-spin and down-spin Cu sites are indicated by open and filled circles, respectively. The numbers in the parentheses for each state are the relative energies (in meV per formula unit) obtained from the DFT+U calculations, where the numbers from left to right refer to the cases of  $U^{\text{eff}} = 2, 4, 6,$  and  $8$  eV, respectively.
